# Supplementary material for: Effect of quitting immediately vs progressively on smoking cessation for smokers at emergency department in Hong Kong: A posteriori analysis of a randomized controlled trial
Source: PubMed Central journal article supplement (PMC9879435; doi:10.1371/journal.pone.0280925), 2023-01-26
Supplement: pone.0280925.s006.pdf [file pone.0280925.s006.pdf]

# Trial Protocol with Statistical Analysis Plan

1  
2  
3  
4  
5  
6  
7  
8  
9  
10  
11  
12  
13  
14  
15  
16  
17  
18  
19  
20  
21  
22  
23  
24  
25

## Section 1: Administrative information

**Title:** Effectiveness of a Brief, Self-determination Intervention for Smoking Cessation (Immediate or Progressive) Among People Attending Emergency Departments: a Randomised Controlled Trial

**Brief Title:** Smoking Cessation Among People Attending A&E

**Trial registration:** ClinicalTrials.gov Identifier: NCT02660957

## Section 2: Introduction

### Introduction

Cigarette smoking, which causes serious damage to health resulting in many chronic problems including cancer, heart disease, stroke and lung disease [1], is the single most important, preventable cause of death and diseases [2]. It is therefore crucial that healthcare professionals should promote smoking cessation and help patients quit. The Hong Kong government and community have put enormous efforts on raising tobacco tax, smoke-free legislation, law enforcement, health promotion campaigns and smoking cessation services. The prevalence of daily cigarette smokers has been decreasing from 23.3% in 1982 to 11.1% in 2010, which is the lowest in the developed world [3]. Nevertheless, around two-thirds of smokers have never tried to give up smoking [4].

Medical attention at Accident and Emergency Departments (AEDs) of smokers who are in physical discomfort can be developed as an excellent “teachable model” as it provides an invaluable opportunity to initiate smoking cessation. Smokers consulting doctors as an emergency are more liable to change their habits to improve their health. According to the Hospital Authority [5], about 2 million people attend AEDs in Hong Kong each year, of whom 68% are triaged as semi-urgent (level 4) and non-urgent (level 5). The average waiting time for a medical consultation varies among AEDs, but is generally longer than 30 min for triage level 4 and 1-2 h for level 5 [6] – presenting healthcare professionals with a golden opportunity to advise smokers to quit and on the available smoking cessation programmes while they are waiting. However, most of the cessation programmes, including stage-matched interventions, generally take several to more than 30 minutes to implement and hence are not practicable or feasible in busy clinical settings. Indeed, the most common reason cited by healthcare professionals for being unable to help patients to quit smoking is the lack of time, because

26 they are very busy and cannot spare even a few extra minutes to do so [7]. Other barriers include a  
27 lack of training and experience, a lack of confidence in the effectiveness of the interventions, and the  
28 absence of incentives and deficiencies in support or requirements by hospital management that these  
29 programmes should be implemented. Moreover, our previous smoking cessation projects in  
30 outpatient clinics have revealed that many patients are too impatient to undergo a long intervention  
31 and some are reluctant to participate for fear that they might miss or experience delays in their  
32 medical consultation or other medical procedures. To address such problems, further studies are  
33 warranted to develop brief and effective interventions with simple, direct, strong, evidence-based  
34 warnings for patients who smoke.

35 Smoking is addictive and quitting is very difficult, with a high rate of relapse, particularly among  
36 those with high nicotine dependency [8, 9]. Our previous smoking cessation projects in outpatient  
37 clinics and the community have revealed that many smokers who are reluctant to quit are interested  
38 in reducing the number of cigarettes smoked per day. Therefore, another potential option would be to  
39 help smokers to reduce the number of cigarettes smoked gradually, with the ultimate goal of  
40 complete cessation. Several randomised controlled trials in the West have supported that smoking  
41 reduction interventions can help smokers first reduce and eventually quit smoking [10-12].

#### 42 **What we have achieved to date:**

43 We conducted a ‘proof-of-principle’ pilot randomised controlled trial on a very brief (<30 s) smoking  
44 cessation intervention with a ‘one in two smokers will be killed by smoking’ warning in medical  
45 outpatient clinics in Guangzhou [13]. The results showed that more of the smokers who received this  
46 brief advice quit or reduced their smoking than did not. This pilot study suggested that even a very  
47 brief intervention on smoking cessation is better than no advice in the ‘real world’ practice for  
48 outpatient clinics. Moreover, the study demonstrated the feasibility and acceptability of the  
49 implementation of a very brief smoking cessation programme by healthcare professionals in busy  
50 clinical settings. In addition, the findings support the need for large randomised controlled trials of  
51 brief or minimal interventions with the ‘one in two’ warning

52 **Aims:** To test the effectiveness of using a brief, self-determination intervention on smoking cessation  
53 (immediate or progressive) for people attending AEDs.

#### 54 **Null hypotheses**

#### 55 **Primary**

56 1. There is no difference in the rate of smoking abstinence among subjects who have either received  
57 the brief, self-determination intervention on smoking cessation (quit immediately & progressively) or  
58 a placebo control intervention at 1 week, and 1, 3, 6, 9, and 12 months.

59 Secondary

60 2. There is no difference in the rate of smoking abstinence among subjects who have either received  
61 the brief, self-determination intervention on smoking cessation (quit immediately) or a placebo  
62 control intervention at 1 week, and 1, 3, 6, 9, and 12 months.

63 3. There is no difference in the rate of smoking abstinence among subjects who have either received  
64 the brief, self-determination intervention on smoking cessation (quit progressively) or a placebo  
65 control intervention at 1 week, and 1, 3, 6, 9, and 12 months.

66 4. There is no difference in the rate of smoking abstinence among subjects who have either received  
67 the brief, self-determination intervention on quitting immediately or progressively at 1 week, and 1, 3,  
68 6, 9, and 12 months

69 **Section 3: Study Methods**

70 **Study design:** A single-blinded multi-centre randomized controlled trial, with two-group pre-test and  
71 repeated post-test, between subjects design will be conducted following CONSORT statements.

72 **Settings:** The settings will be the AEDs in three hospitals (United Christian Hospital, Queen Mary  
73 Hospital and Tuen Mun Hospital). The Nurse-in-Charge and the Chief of Service of the AED of the  
74 United Christian Hospital have agreed to participate in the study and provide assistance. We are in  
75 the process of inviting another two hospitals to participate in the study, while waiting for the result of  
76 the application. All of these hospitals are chosen because they have participated in our previous RCT  
77 on cardiac, diabetes and cancer patients and are experienced and cooperative.

78 **Subjects:** Chinese patients attending one of the three AEDs at different clusters in Hong Kong  
79 (United Christian Hospital, Queen Mary Hospital and Tuen Mun Hospital) for physical discomfort  
80 who fulfil the following inclusion criteria will be invited to participate in the study. The inclusion  
81 criteria are: (1) aged 18 years or above, (2) triaged as semi-urgent (level 4) or non-urgent (level 5), (3)  
82 smoke at least two cigarettes per day and (4) express a willingness to quit smoking. The exclusion  
83 criteria are: (1) poor cognitive state or mental illness and (2) participation in other smoking cessation  
84 programmes or services. All smoking patients will be referred by triage nurses after determining the

85 clinical urgency in accordance with the triage guidelines set by the Hospital Authority. Smoking  
86 patients will then be approached by our research assistants.

87 **The conceptual framework:** The intervention is guided by the social cognitive theory and the self-  
88 determination theory. According to social cognitive theory, self-efficacy is an important personal  
89 determinant of human behaviour and has been defined as the belief in one's capability to engage in  
90 behaviour to solve difficult tasks. This belief influences decisions on whether a certain form of  
91 behaviour will be adopted and maintained [16]. Because self-efficacy is built on a successful  
92 experience of overcoming challenging tasks [16], smokers who have more successful experiences in  
93 reducing cigarette consumption tend to have higher levels of self-efficacy. Some evidence has shown  
94 that a reduction in smoking may lead to greater self-efficacy to resist smoking, which could increase  
95 subsequent quitting [17].

96 According to the self-determination theory [18], behavioural regulation is more autonomous when it  
97 is internalized, as opposed to being regulated by external factors (e.g., orders from family members,  
98 friends, or healthcare professionals). Compared with external regulation, autonomous regulation is  
99 associated with increased self-efficacy, greater behavioural persistence, long-term behavioural  
100 changes, and more positive health behaviour [16]. Autonomy is another influential determinant of  
101 behaviour which is emphasized by freedom of choice [18]. Studies have shown that patients who  
102 have an opportunity to decide on their own treatment may feel more eager to comply with  
103 instructions [19]. The subjects in this study will be allowed to select their own schedules of quitting  
104 after discussions with the trained research assistant, such as to quit immediately or to reduce the  
105 number of cigarettes smoked progressively with the ultimate goal of complete cessation over an  
106 acceptable period. It is anticipated that the subjects will show more willingness to adhere to their own  
107 schedule as a result of an increase in autonomy. Moreover, some evidence has shown that autonomy  
108 is positively associated with competence [20]; that is, people who have greater autonomy  
109 demonstrate higher competence in achieving behavioural change. Consequently, autonomy will  
110 facilitate their gradual cessation of smoking.

111 **Randomization:** The method of simple complete randomization will be adopted. Subjects will be  
112 randomly allocated into one of the two groups: A placebo control group or the intervention group.  
113 Randomization will be performed by opening of a serially labelled, opaque and sealed envelope  
114 (SNOSE) with a card inside indicating the randomly allocated group by a research assistant  
115 (independent to those who provide interventions to subjects). The random numbers for group

116 assignment will be generated by another research assistant of the project using a personal computer  
117 before subject recruitment. Allocation concealment will be ensured. With random assignment of  
118 individuals to the intervention or control groups, the possibility existed for interaction between the  
119 two groups of subjects while waiting for medical consultation. A precautionary measure will be taken  
120 in the AEDs by assigning the same waiting area or cubicle to either the control or the intervention  
121 subjects.

122 **Intervention:** Subjects in the intervention group will be allowed to select their own schedules of  
123 quitting after discussing their situation with the trained research assistant (quit immediately (QI), or  
124 quit progressively (QP) with the ultimate goal of completing cessation over an acceptable period).  
125 Subjects in the intervention QI subgroup will receive a smoking cessation leaflet plus a brief  
126 intervention using the AWARD model: (a) Ask about smoking history, (b) Warn about the high risk,  
127 (c) Advise to quit now, as quitting can greatly reduce risks, (d) Refer smokers to a smoking cessation  
128 clinic or to smoking cessation hotline: 1833183, and (e) Do it again: repeat the intervention and  
129 encourage smokers who fail to quit or relapse to try again during each telephone follow-up. For the  
130 warning message, the trained research assistant will repeat the following in a standardized manner:  
131 (draft, will be improved after pilot testing) 'The World Health Organization says that based on  
132 medical research, one out of two smokers will be killed by smoking. This 50% risk is very high. You  
133 have decided to reduce smoking as you know this is good for you.' The whole intervention will be  
134 limited to less than 1 min or slightly longer if necessary.

135 Subjects in the QP subgroup will receive a smoking cessation leaflet plus brief intervention using  
136 AWARD model similar to the QI subgroup, except for the 'advice' being given to them. Subjects  
137 will be asked to think about a tailored quitting schedule for themselves after the discussions with the  
138 trained research assistant. The trained research assistance will motivate the subjects to quit  
139 progressively over an agreed period not to exceed 6 months.

#### 140 Rationale for using a brief intervention programme

141 A brief intervention with a small to moderate effect size can potentially benefit a large number of  
142 smokers and increase smoking cessation within the community if it is carried out routinely in clinical  
143 practice by all or most healthcare professionals or people with minimal training. It is also the most  
144 cost-effective smoking cessation programme, because no extra or minimal funding is needed to  
145 provide the venue, manpower, and other expenses (but incentives or payments to healthcare

146 professionals and follow-up support would be needed). There is no evidence that longer interventions  
147 are more effective than shorter interventions [14]. Brief cessation interventions have been shown to  
148 be effective with strong evidence from our randomised controlled trials [13] and in systematic  
149 reviews [14, 15].

#### 150 Follow-up intervention

151 For the subsequent telephone follow-up in the intervention group, information on reduction and  
152 cessation will be collected, followed by a ‘booster’ intervention, which will repeat the health warning  
153 that ‘one in two smokers will be killed by smoking’, positively encourage them to reinforce their  
154 efforts, and remind subjects in the QP subgroup of their next reduction target. For example, if  
155 subjects report that they have reduced or stopped smoking, the trained research assistant will say:  
156 ‘Congratulations on your successful reduction/abstinence. How confident are you that you will be  
157 able to keep on quitting according to your plan (for QI). How much do you plan to reduce further and  
158 how would you plan to smoke increasingly less (for QP)? We are confident that you can succeed in  
159 quitting and lead a healthier life.’ However, if subjects report that they failed to quit or have not  
160 reduced smoking, the trained research assistant will say: ‘Don’t be disappointed. Would you please  
161 tell me how you would try and plan to quit or reduce smoking now or in the near future?’ The trained  
162 research assistant will give brief suggestions to the subjects based on their responses and reinforce  
163 the message that quitting smoking is good for their health and that they can do it.

164 Six consecutive (1 week, and 1, 3, 6, 9, and 12 months) follow-ups will be conducted over the  
165 telephone by trained interviewers. Outcome assessment will first be carried out with blinding to the  
166 group assignment. Then, the group status will be disclosed so that the intervention group will receive  
167 the booster intervention and the placebo control group will not. We propose to extend the follow-up  
168 period from 12 months to 24 months for future study if other funding becomes available.

169 Subjects in the placebo control group will receive a smoking cessation leaflet published by the Hong  
170 Kong Council on Smoking and Health (COSH), as will the intervention group. Moreover, subjects in  
171 the placebo control group will undergo a similar schedule of telephone follow-up as those in the  
172 intervention group. They will receive a ‘placebo’ intervention with a ‘placebo booster’ of the same  
173 duration on increasing physical activity and fruit and vegetable intake.

174

175 **Instruments:** A structured questionnaire will be developed by adopting or modifying international  
176 and/or locally validated instruments. The questionnaire gathers information including smoking and  
177 quitting history, stage of readiness to quit, and demographic information such as age, gender, and  
178 marital status. The demographic and clinical information will be obtained from the AEDs medical  
179 records.

## 180 **Outcome measures**

181 Baseline data, including demographics, health status, and smoking history, will be obtained from  
182 each patient using a structured questionnaire, administered in face-to-face interviews by the trained  
183 research assistant prior to randomisation.

184 The primary outcome measure is self-reported 7-day point prevalence of abstinence at 1 week, and 1,  
185 3, 6, 9, and 12 months. Secondary outcomes are: (i) biochemically validated abstinence at 6 and 12  
186 months, (ii) self-reported reduction of  $\geq 50\%$  in cigarette consumption at 1 week, and 1, 3, 6, 9, and  
187 12 months, and (iii) b biochemically validated reduction of  $> 50\%$  in cigarette consumption at 6 and  
188 12 months. Patients who have successfully quit smoking or reduced cigarette consumption by at least  
189 50% at 6-, and 12 month will be invited to biochemical validation tests. We will offer HK\$300 per  
190 client to cover their travel expenses and time cost. From our previous experience, such an incentive is  
191 necessary to secure a sufficiently high response rate. It is a common practice in clinical trials to  
192 include financial incentives in order to encourage subjects to come back for biochemical validation  
193 and to sponsor their travelling expenses at follow up. Note that the incentive is not for joining the  
194 trial. The biochemically validated 7-day point prevalence of abstinence will be confirmed by a  
195 carbon monoxide level in expired air  $< 9$  parts per million (p.p.m.) and saliva cotinine level  $< 115$   
196 ng/ml in parallel test [21]. The biochemically validated reduction of  $> 50\%$  in cigarette consumption  
197 will be confirmed by exhaled carbon monoxide. Subjects will be considered non-reducers if they  
198 have reduced their exhaled carbon monoxide level by  $< 1$  ppm compared with baseline. These  
199 biochemical validation methods have been used in previous smoking cessation and reduction studies  
200 [8, 9].

## 201 **Sample size calculation:**

202 Sample size calculation is based on the main outcome variable according to the main hypotheses, the  
203 7-day point prevalence self-reported quit rate at 6-month in the intervention group is higher than that

204 in the control arm of the RCT. With reference to our previous RCT testing the effect of smoking  
205 reduction for smokers not willing to quit smoking [8], we assume that the quit rate was 10.2% in the  
206 control group and 17.0% in the intervention group. With  $\alpha = 0.05$ ,  $\beta = 0.2$  (power = 80%), two-tailed  
207 z test, the sample size is estimated to be 796 in total. Taking into account the retention rate of about  
208 90% from the previous RCT [8], we plan to recruit at least 886 subjects (443 X 2 arms) for the  
209 current RCT.

210 With reference to the Hospital Authority Statistical Report [5], there are overall 549,856 attendances  
211 to the AEDs of United Christian Hospital, Queen Mary Hospital and Tuen Mun Hospital during 2011  
212 to 2012. According to our previous smoking cessation projects conducted in out-patient clinics, about  
213 5% patients were smokers. However, more than 50% of these smokers were reluctant to quit.  
214 Therefore, in a rough estimation, there will be around 5,000 eligible subjects in the three selected  
215 AEDs each year. Therefore, we have confidence that we can recruit adequate subjects (886)  
216 according to the power analysis within a 9-month (39-week) recruitment period. Data collection will  
217 be performed at the AEDs from 9am to 5pm on the weekdays.

218 We will offer HK\$100 to each eligible subject who participate in the study and complete six  
219 consecutive (1 week, and 1, 3, 6, 9, and 12 months) telephone follow-ups. According to our  
220 experience with an on-going RCT on testing the effectiveness of an intervention of smoking fathers  
221 living with non-smoking spouse and infant, monetary incentive of \$100 can effectively boost the  
222 participation rate from about 30% to 60% at 6-month follow-up.

223 **Training and quality assurance of the research assistants:** All the research assistants will be  
224 provided with specific training workshop by the PI and Co-Is prior to the commencement of the  
225 study. They will be equipped with the necessary knowledge and skills to deliver both the smoking  
226 cessation advice using the AWARD model. Regular case conference, quality checks through audio-  
227 taping, and audit procedures will be conducted to ensure and maintain the quality and uniformity of  
228 the interventions. Moreover, the research assistant(s) will be trained to screen eligible case, conduct  
229 baseline and follow-up surveys and procedures of biochemical validations (saliva cotinine test and  
230 exhale CO test) by PI and Co-Is. Briefing sessions will also be provided to AEDs nurses.

231 Since the same batch of AEDs nurses working in the setting would contact subjects in both the  
232 intervention and control group, a quality assurance mechanism will be used to prevent the  
233 contamination of intervention and control group. Apart from assigning the same waiting area or



234 cubicle to either the control or the intervention subjects (mentioned in point 5: Randomization), a  
235 clear instruction and reminder will be given to the participating nurses before the start of the RCT  
236 study. Moreover, we will explain the principle of RCT and reinforce them the different treatments for  
237 the intervention and control groups. Additionally, doctors and nurses will be reminded that their care  
238 will be as usual.

239 **Quality and data security control:** This study will follow the protocol of quality assurance  
240 developed by a previous project [22]. The PI/ co-Is, project coordinator and research assistants will  
241 set up orientation meetings with COS, nurse managers and frontier nurses to explain the protocol, the  
242 flow of logistics and examine the physical facilities available in the hospital. The PI/ co-Is will  
243 answer any queries raised by doctors and nurses immediately at any time point. The project  
244 coordinator will be present during the first week to monitor the subject recruitment and data  
245 collection process. All blank and completed instruments will be sealed in separate opaque envelopes,  
246 which will be kept in a locker with keys provided by hospitals, while the project coordinator will  
247 collect the filled instruments weekly by hand. All collected instruments will be saved in a locker with  
248 keys in our School. The project coordinator and other research assistant(s) of this project will be  
249 responsible to input the data into SPSS, with the dataset encrypted in an assigned PC in our School.  
250 Only the PI, co-Is, project coordinator, relevant research assistants, the independent data monitoring  
251 committee (IDMC), and the Institution of Review Board (IRB) may have rights to access the data (in  
252 hard or soft copy).

#### 253 **Section 4: Statistical principle and analysis**

254 **Statistical software:** The Statistical Package for Social Sciences (SPSS Version 23.0, SPSS Inc.,  
255 Chicago, IL) software for Windows was used for analysis of the quantitative data.

256 **Analysis methods:** Data analysis will be performed using the Statistical Package for Social  
257 Science. We will compare the baseline characteristics of the patients by  $\chi^2$  test for categorical  
258 variables and F-test for continuous variables between the intervention and the control group. We  
259 shall use the  $\chi^2$  test to assess the effect of intervention and calculate the crude odds ratio (OR)  
260 with 95% confidence interval (CI) for the primary and secondary outcomes. Those who are lost  
261 to follow-up at 1 week, and 1, 3, 6, 9, and 12 months, or refuse to participate in the validation  
262 tests, will be treated as smokers with no reduction in cigarette consumption compared with (a)

263 baseline, as the main analysis (by intention to treat), (b) the most recent level) and (c) complete  
264 case (per protocol) analysis by excluding subjects with missing data as a sensitivity analysis.

265 **Independent data monitoring committee (IDMC):** An IDMC will be set up with local and  
266 international experts (3-5 people) in smoking cessation trials to review the progress every 6  
267 months to advise and set guidelines for continuing or stopping of subject recruitment as  
268 necessary.

269 Timetable of work: The study is expected to be completed in 24 months.

270 Existing facilities: Essential facilities such as office space, computer, statistical packages,  
271 software, printer and telephone sets will be provided by the School of Nursing, the University of  
272 Hong Kong.

273 Purpose of potential for implementation of the results

274 It is crucial for healthcare professionals to help patients quit smoking. But most existing smoking  
275 cessation interventions generally take several to more than 30 minutes to implement and hence  
276 are not feasible in busy clinical settings. Further studies are warranted to develop brief and  
277 effective interventions with simple, direct, strong, evidence-based warnings for patients who  
278 smoke. Strong evidence from a randomised controlled trial on the effectiveness of brief and  
279 practicable interventions would have the greatest potential to ensure that interventions would be  
280 carried out routinely in clinical and community settings, benefiting a large number of smokers.  
281 We shall conduct an RCT on a brief, self-determination intervention for smoking cessation  
282 (immediate or progressive) among people attending emergency departments. To our knowledge,  
283 this is the first study on a brief, self-determination intervention on smoking cessation for people  
284 attending emergency departments, which will generate new knowledge and evidence, with major  
285 clinical and public health implications. Specifically, this innovative, cheap, and brief intervention  
286 to achieve a greater level of smoking abstinence will make an important contribution to the  
287 evidence-based practice of brief smoking reduction programmes. If proven to be effective, and  
288 even if the effect size of the brief intervention is smaller than more intensive brief interventions,  
289 it should be more cost-effective and sustainable in its ability to improve the quality of life of  
290 more smokers, and thus might save more lives. The results should support the development of

291 clinical practice guidelines. Most importantly, the results will motivate more healthcare  
292 professionals and others (including family members of smokers) to help smokers routinely in  
293 clinical and community settings, prompting other researchers to design and evaluate brief  
294 smoking cessation programmes.

## 295 **Reference:**

- 296 1. U.S. Department of Health and Human Services. *How Tobacco Smoke Causes Disease: The*  
297 *Biology and Behavioral Basis for Smoking-Attributable Disease: A Report of the Surgeon*  
298 *General*. Atlanta, GA: U.S. Department of Health and Human Services, Centers for Disease  
299 Control and Prevention, National Center for Chronic Disease Prevention and Health  
300 Promotion, Office on Smoking and Health, 2010.
- 301 2. World Health Organization. *Report on the Global Tobacco Epidemic: Enforcing bans on*  
302 *tobacco advertising, promotion and sponsorship*. Switzerland, Geneva: World Health  
303 Organization; 2013.
- 304 3. Census & Statistics Department. *Pattern of Smoking. Thematic household survey (report no.*  
305 *48)*. Hong Kong: Hong Kong Census & Statistics Department; 2011.
- 306 4. Census and Statistics Department, Social Surveys Section. *Thematic Household Survey*  
307 *Report No. 36: Pattern of smoking*. Hong Kong: Census and Statistics Department, 2008.
- 308 5. Hospital Authority. Hospital Authority Statistical Report (2011-2012).  
309 [http://www.ha.org.hk/upload/publication\\_15/471.pdf](http://www.ha.org.hk/upload/publication_15/471.pdf).
- 310 6. Hospital Authority (2010). Management of Accident & Emergency Services. Internal audit  
311 report. Hong Kong: Hospital Authority.
- 312 7. Vogt F, Hall S, Marteau TM. General practitioners' and family physicians' negative beliefs  
313 and attitudes towards discussing smoking cessation with patients: a systematic review.  
314 *Addiction* 2005; **100**: 1423–31.
- 315 8. Chan SSC, Leung DYP, Abdullah ASM, *et al*. A randomized controlled trial of a smoking  
316 reduction plus nicotine replacement therapy intervention for smokers not willing to quit  
317 smoking. *Addiction* 2011; **106**: 1155-1163.
- 318 9. Wennike P, Danielsson T, Landfeldt B, *et al*. Smoking reduction promotes smoking  
319 cessation: results from a double blind, randomized, placebo-controlled trial of nicotine gum  
320 with 2-year follow-up. *Addiction* 2003; **98**: 1395-1402.
- 321 10. Batra A, Klingler K, Landfeldt B, *et al*. Smoking reduction treatment with 4-mg nicotine  
322 gum: A double-blind, randomized, placebo-controlled study[ast]. *Clin Pharmacol Ther*  
323 2005; **78**: 689-696.
- 324 11. Carpenter MJ, Hughes JR, Solomon LJ, *et al*. Both smoking reduction with nicotine  
325 replacement therapy and motivational advice increase future cessation among smoker  
326 unmotivated to quit. *J Consult Clin Psychol* 2004; **72**: 371-381.
- 327 12. Shiffman S, Ferguson SG, Strahs KR. Quitting by Gradual Smoking Reduction Using  
328 Nicotine Gum: A Randomized Controlled Trial. *Am J Prev Med* 2009; **36**: 96-104.e101.

- 329 13. Lin PR, Zhao ZW, Cheng KK, *et al.* The effect of physician's 30 s smoking cessation  
330 intervention for male medical outpatients: a pilot randomized controlled trial. *J Public*  
331 *Health* 2013; **35**: 375–383.
- 332 14. Aveyard P, Foulds J. *The 2008 US Clinical Practice Guideline: the key recommendations*  
333 *and a commentary*. 2009. [www.treatobacco.net](http://www.treatobacco.net).
- 334 15. Stead LF, Bergson G, Lancaster T. Physician advice for smoking cessation. *Cochrane*  
335 *Database Syst Rev* 2008; 16: CD000165.
- 336 16. Bandura A. *Self-efficacy: The exercise of control*. New York: Freeman, 1997.
- 337 17. Broms U, Korhonen T, Kaprio J. Smoking reduction predicts cessation: longitudinal  
338 evidence from the Finnish adult twin cohort. *Nicotine Tob Res* 2008; **10**: 423-428.
- 339 18. Deci E, Ryan R. *Handbook of self-determination research*. Rochester, NY: University of  
340 Rochester Press, 2002.
- 341 19. Williams GC, Cox EM, Kouides R, *et al.* Presenting the facts about smoking to adolescents:  
342 effects of an autonomy-supportive style. *Arch Pediatr Adolesc Med* 1999; **153**: 959-964.
- 343 20. Williams GC, McGregor HA, Zeldman A, *et al.* Testing a self-determination theory process  
344 model for promoting glycemic control through diabetes self-management. *Health*  
345 *Psychology* 2004; **23**: 58-66.
- 346 21. Jarvis MI, Tunstall-Pedoe H, Feyerabend C, *et al.* Comparison of tests used to distinguish  
347 smokers from non-smokers. *Am J Public Health* 1987; **77**: 1435-1438.
- 348 22. Chan SSC, Lam TH, Lau CP. A randomized controlled trial of a nurse delivered staged-  
349 matched smoking cessation intervention to promote heart health of cardiac patients  
350 (HKU7224/01M). Final report submitted to the Research Grants Council, 2007.
- 351
